# Supplementary material
Source: PubMed Central journal article supplement (PMC4201337)
Supplement: cb500492r_si_001.pdf [file cb500492r_si_001.pdf]

| HDAC | SAHA              | PCI-34051        | BRD3811 |
|------|-------------------|------------------|---------|
| 1    | 0.005<br>± 0.002  | 24.4<br>± 12.8   | >25     |
| 2    | 0.018<br>± 0.009  | 17.8<br>± 15.4   | >25     |
| 3    | 0.004<br>± 0.002  | >25              | >25     |
| 4    | >25               | >25              | >25     |
| 5    | 10.5<br>± 4.62    | >25              | >25     |
| 6    | 0.002<br>± 0.0008 | 7.92<br>± 5.13   | >25     |
| 7    | >25               | >25              | >25     |
| 8    | 1.00<br>± 0.698   | 0.011<br>± 0.006 | >25     |
| 9    | >25               | >25              | >25     |

**Supplementary Table 2. IC<sub>50</sub> values for compounds used in this study.** IC<sub>50</sub> values were determined using the caliper assay (see methods for details) and are reported as mean of at least four experiments ± standard deviation.
