# Supplementary material
Source: PubMed Central journal article supplement (PMC4201337)
Supplement: cb500492r_si_005.pdf [file cb500492r_si_005.pdf]

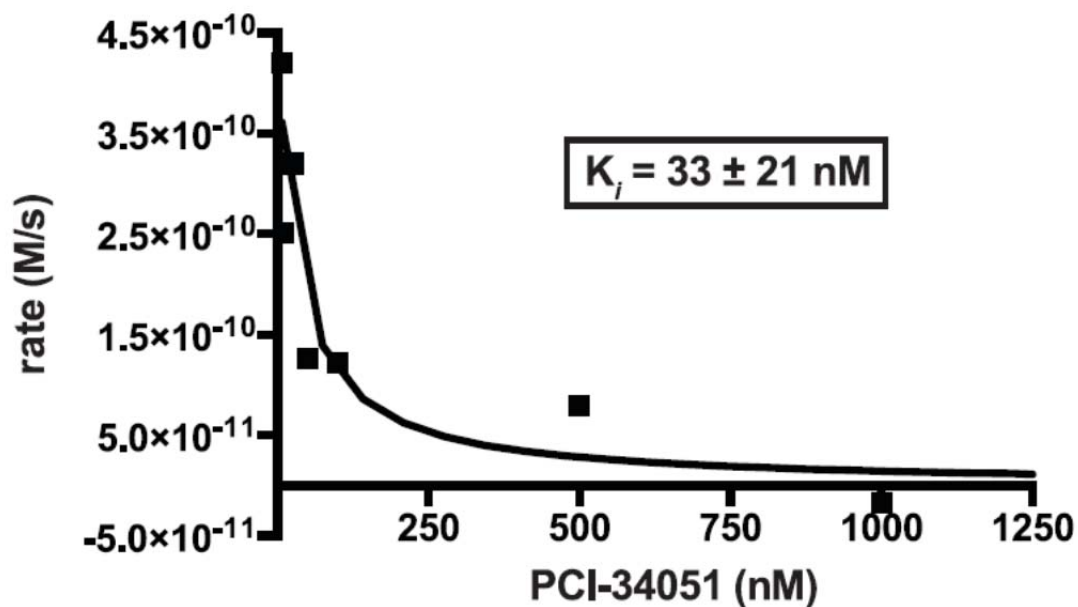

**Supplementary Figure 2. PCI-34051 potently inhibits *in vitro* deacetylation of a peptide corresponding to acetylated ARID1A catalyzed by HDAC8.** The value of the inhibition constant ( $K_i$ ) for PCI-34051 was measured from the dependence of the deacetylation activity at various inhibitor concentrations measuring the formation of acetate using an enzyme-coupled assay. The reaction contained recombinant Zn(II)-HDAC8 (5 nM) and Ac-KLISKacFDKL-NH<sub>2</sub> (peptide corresponding to ARID1A, 100  $\mu$ M) in assay buffer (2.7 mM KCl, 137 mM NaCl, 50 mM HEPES, pH 7.8, 0.001% BSA, 0.001% Tween 20).
