# Supplementary material
Source: PubMed Central journal article supplement (PMC4201337)
Supplement: cb500492r_si_006.pdf [file cb500492r_si_006.pdf]

| Protein | Ac-Sequence-NH <sub>2</sub> | HDAC1 | HDAC2 | HDAC3 | HDAC4 | HDAC6 | HDAC7 | HDAC8 | HDAC9 |
|---------|-----------------------------|-------|-------|-------|-------|-------|-------|-------|-------|
| RAI1    | KLGGKacQRAA                 | 50    | < 20  | 1700  | -     | -     | -     | < 20  | < 20  |
| ZRANB2  | TEIGKacTLAEK                | < 20  | < 20  | 50    | <20   | 270   | ≤ 20  | < 20  | < 20  |
| THRAP3  | LGDGKacMKS                  | < 20  | 30    | 1600  | -     | -     | -     | < 20  | < 20  |
| NCOA3   | KRILHKacLLQN                | 70    | < 20  | 2200  | < 20  | 70    | 140   | -     | < 20  |
| SRSF5   | KLSGKacEING                 | < 20  | < 20  | 60    | 70    | 820   | -     | < 20  | < 20  |
| ARID1A  | KLISKacFDKL                 | 50    | ≤ 20  | 2500  | < 20  | 1200  | < 20  | 2400  | < 20  |
| CSRP2BP | STPVKacFISR                 | 50    | < 20  | 1500  | < 20  | 210   | -     | 740   | < 20  |
| MLL2    | SKIQKacQLDQ                 | < 20  | 30    | 220   | -     | -     | -     | -     | < 20  |

**Supplementary Table 3. *In vitro* peptide deacetylation catalyzed by commercially available HDACs.** The initial rate for acetate production, determined from 1-2 time points, was measured using commercially available recombinant HDAC 1-9 (0.4 μM, purchased from BPS Biosciences) and acetylated peptide (100 μM) in assay buffer (2.7 mM KCl, 137 mM NaCl, 50 mM HEPES, pH 7.8). The value of  $k_{cat}/K_M$  (in  $M^{-1}s^{-1}$ ) was calculated assuming a linear dependence on the substrate concentration. Dashes indicate particular combinations of peptides and enzyme isoforms that were not measured. The HDAC8 purified from baculovirus has higher specific activity than the recombinant enzyme purified from *E. coli*.
