# Supplementary material
Source: PubMed Central journal article supplement (PMC4201337)
Supplement: cb500492r_si_007.pdf [file cb500492r_si_007.pdf]

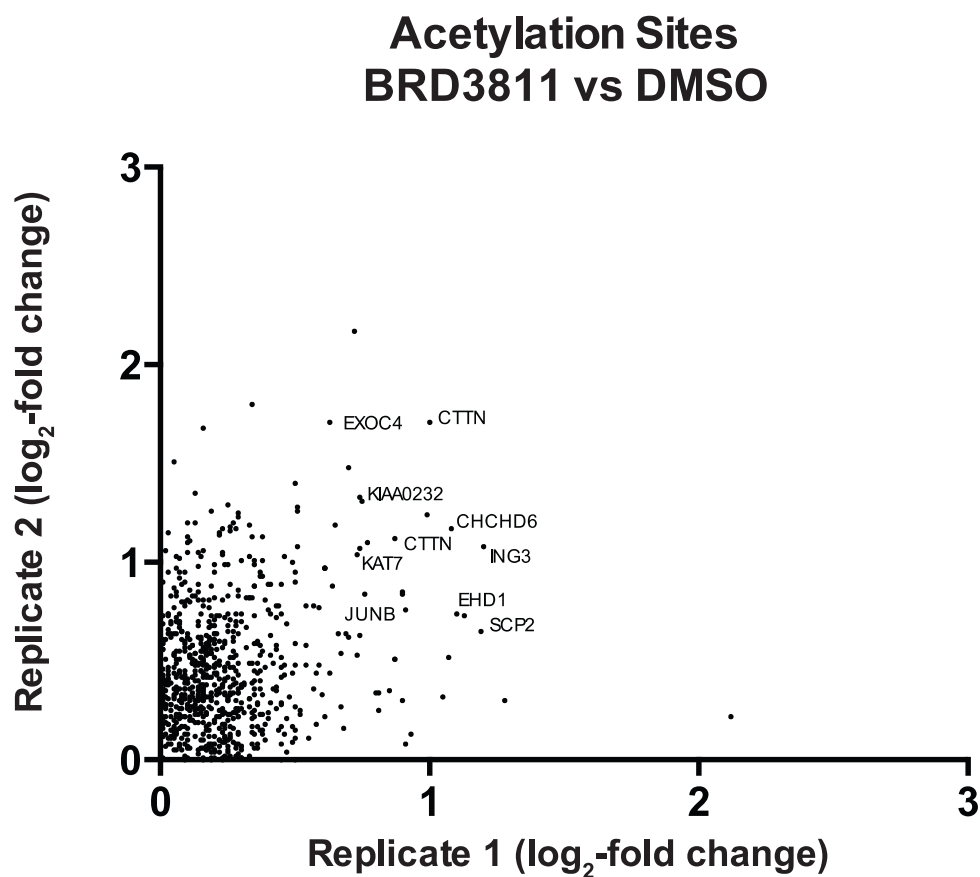

**Supplementary Figure 1. Treatment with BRD3811 induces changes in protein acetylation.** Axes represent  $\log_2$ -fold changes in acetylation for two independent experiments. Dashed lines denote a 1.5-fold change. Representative examples of proteins whose acetylation was regulated by more than 1.5-fold in each of two replicates are highlighted.
