# Supplementary material
Source: PubMed Central journal article supplement (PMC4201337)
Supplement: cb500492r_si_008.pdf [file cb500492r_si_008.pdf]

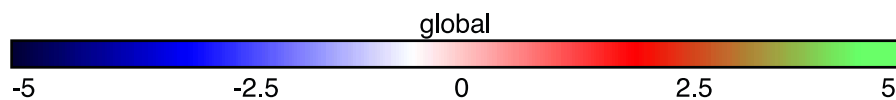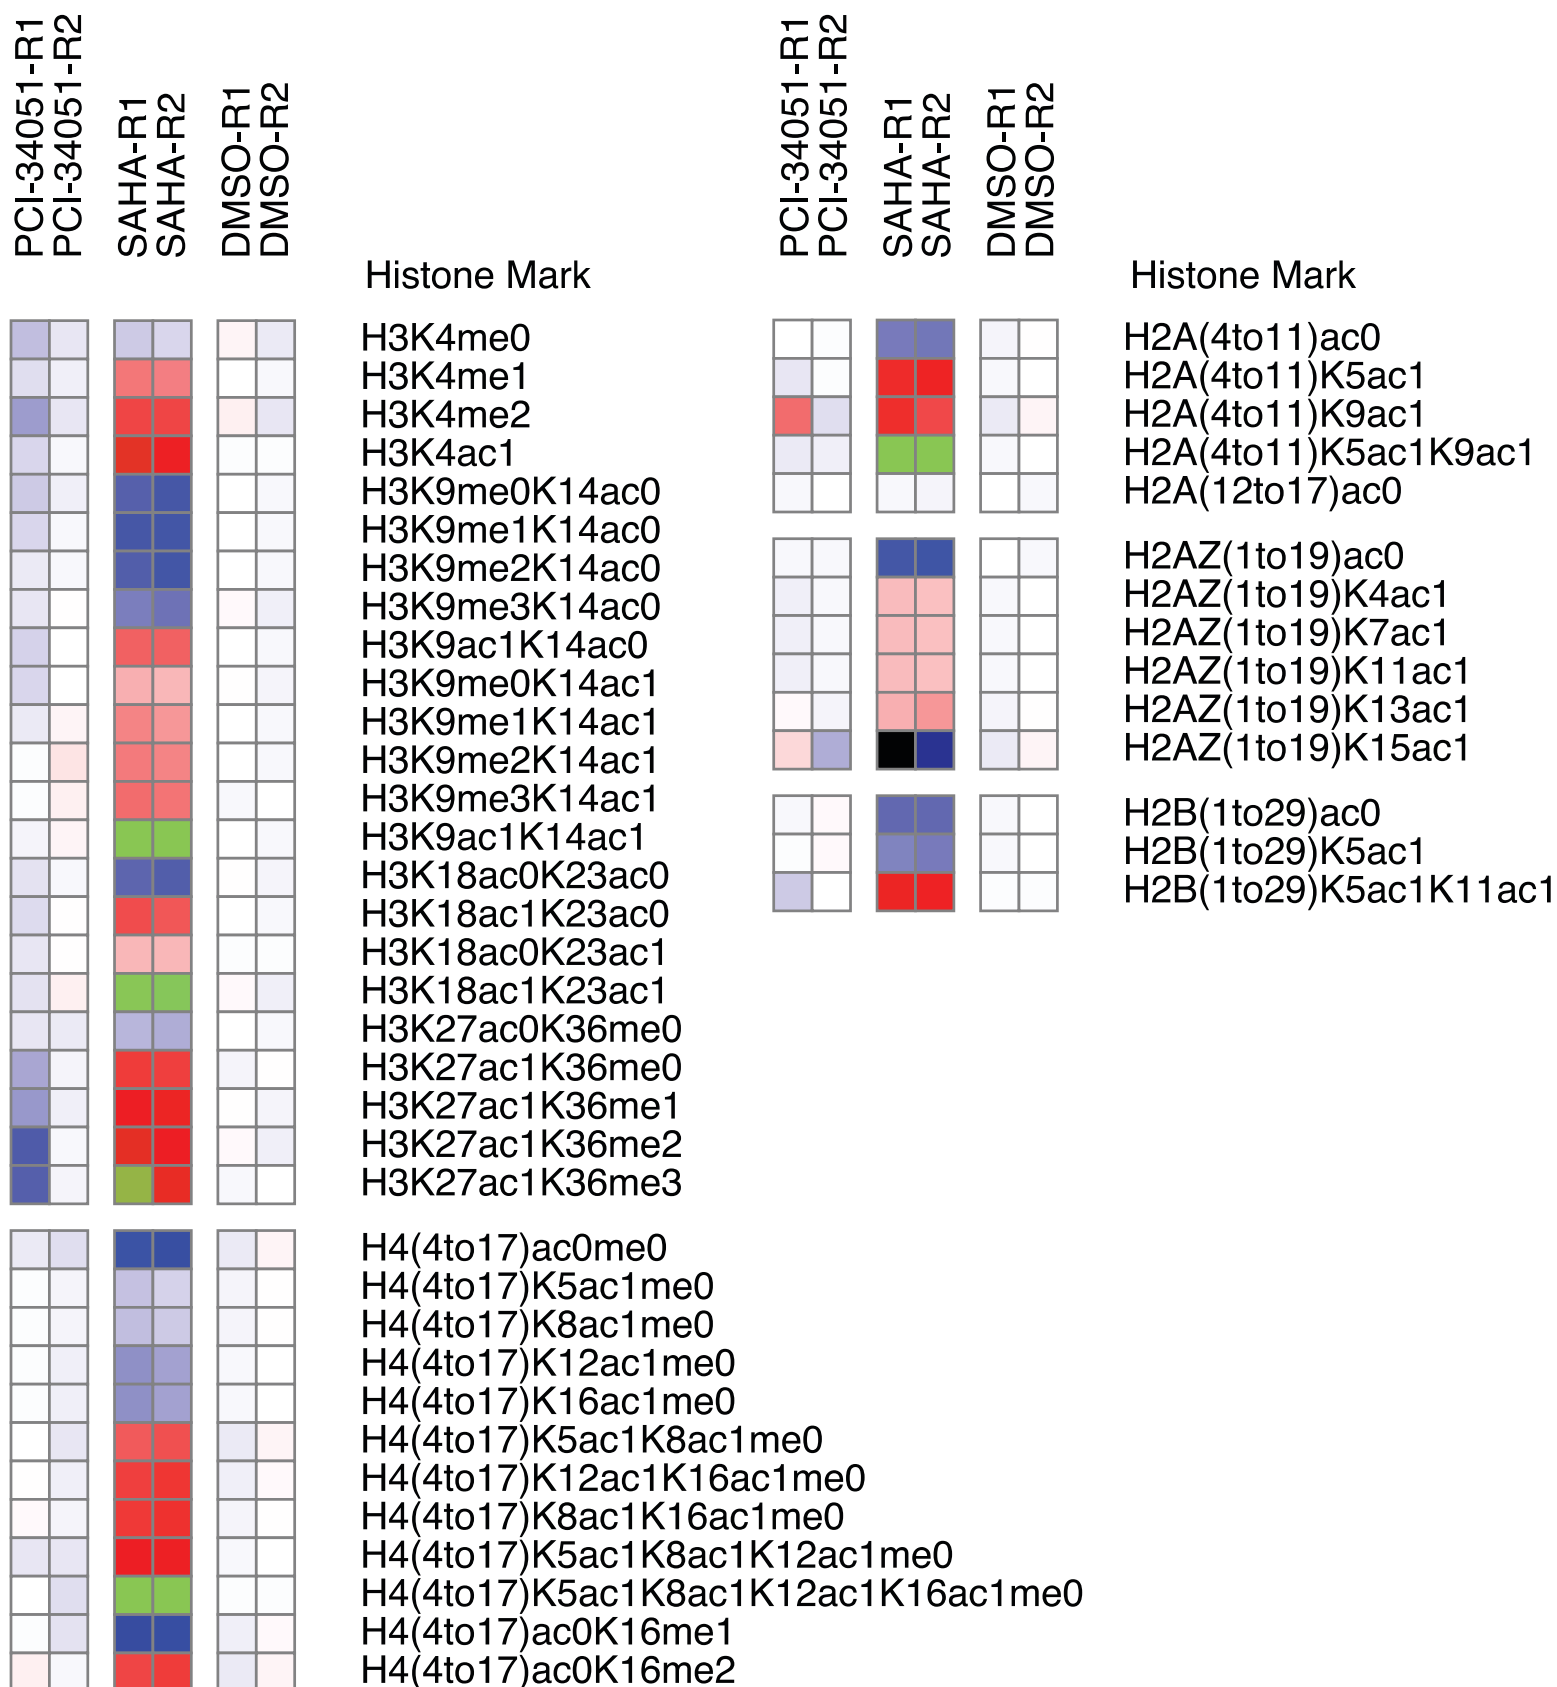

**Supplementary Figure 3. Histone acetylation is not altered by treatment with PCI-34051.** Each row represents a unique combination of histone modifications (as denoted by “Histone Mark”) and each column represents a treatment of MCF-7 cells with the compound indicated at 10  $\mu$ M for 24h. Each compound treatment was performed in biological duplicate (R1 and R2). Each cell is colored by the  $\log_2$ -fold change over the average of the DMSO replicates as denoted in the scale bar. Global histone profiles were obtained in a manner essentially equivalent to a previous report.<sup>26</sup>
