# Supplementary material
Source: PubMed Central journal article supplement (PMC4201337)
Supplement: cb500492r_si_009.pdf [file cb500492r_si_009.pdf]

**a** *Expression Similarity between PCI-34501 Treatment and Gene Overexpression*

| Rank Order | Gene    | Percentile Rank |
|------------|---------|-----------------|
| 1          | CDKN1A  | 96.0            |
| 2          | DLX3    | 92.5            |
| 3          | CD40    | 91.2            |
| 4          | MAGEB6  | 90.6            |
| 5          | PRKCE   | 89.4            |
| 6          | TXNIP   | 88.7            |
| 7          | KLF6    | 87.7            |
| 8          | CDKN1B  | 87.1            |
| 9          | NFE2L2  | 86.9            |
| 10         | GADD45B | 85.8            |
| 11         | EBF1    | 85.6            |
| 12         | OVOL2   | 85.4            |
| 13         | RELB    | 85.4            |
| 14         | GATA2   | 85.0            |
| 15         | POU5F1  | 84.9            |
| 16         | HOXA9   | 84.8            |
| 17         | TLE1    | 84.7            |
| 18         | ISX     | 84.4            |
| 19         | PHB     | 83.6            |
| 20         | RARG    | 83.2            |

*Expression Similarity between BRD3811 Treatment and Gene Overexpression*

| Rank Order | Gene    | Percentile Rank |
|------------|---------|-----------------|
| 1          | ZBTB20  | 82.7            |
| 2          | MAGEB6  | 78.7            |
| 3          | GADD45B | 77.7            |
| 4          | PHB     | 76.8            |
| 5          | LYN     | 76.4            |
| 6          | SF1     | 76.2            |
| 7          | LTBR    | 75.3            |
| 8          | KLF6    | 75.2            |
| 9          | PCGF3   | 74.9            |
| 10         | SATB2   | 73.8            |
| 11         | S1PR3   | 72.4            |
| 12         | GATA2   | 72.3            |
| 13         | BCL10   | 72.1            |
| 14         | HOXA5   | 69.9            |
| 15         | RASD1   | 69.9            |
| 16         | OVOL2   | 68.3            |
| 17         | ZNF366  | 68.2            |
| 18         | PRDM1   | 67.4            |
| 19         | MEIS2   | 67.1            |
| 20         | FOXA3   | 67.0            |
| ...        | ...     | ...             |
| 25         | CDKN1A  | 65.9            |

**b**

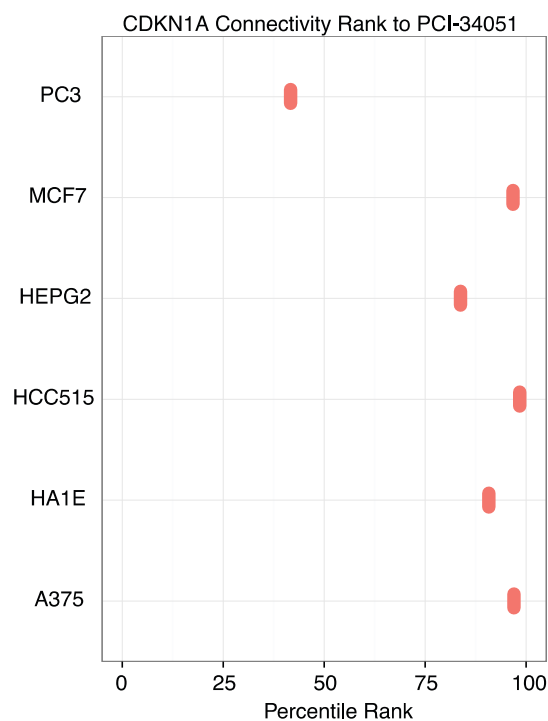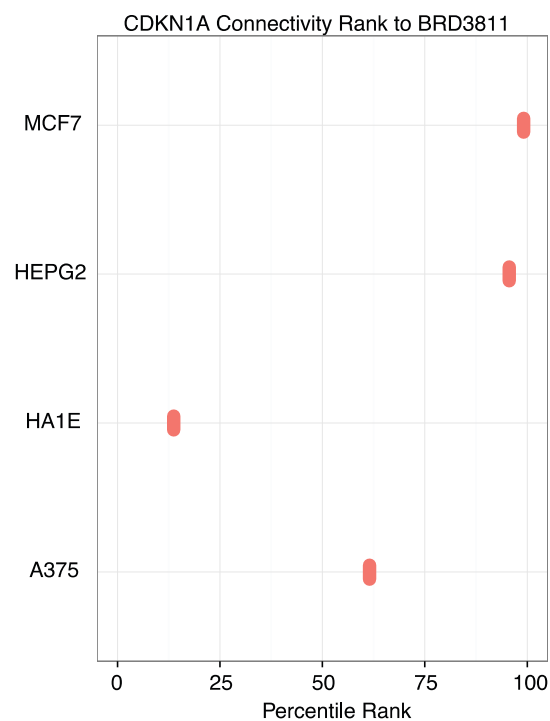

**Supplementary Figure 4. PCI-34051 treatment is highly correlated with p21 (CDKN1A) overexpression.** (a) Average percentile rank by gene expression signature similarity across multiple cell types. Treatment with PCI-34051 is highly correlated with p21 (CDKN1A) overexpression (96th percentile on average) while treatment with BRD3811 is not (66 percentile on average). Percentile ranks are relative to a total of 430 overexpressed genes. (b) PCI-34051 treatment produced a replicable expression signature in 6 cell lines while BRD3811 treatment was replicable in only 4. For the cell lines in which the compound treatments were reproducible, PCI-34051 treatment was more similar to p21 overexpression than was BRD3811 treatment.
