# Supplementary material
Source: PubMed Central journal article supplement (PMC4201337)
Supplement: cb500492r_si_010.pdf [file cb500492r_si_010.pdf]

# Supplementary Figure 5

**a**

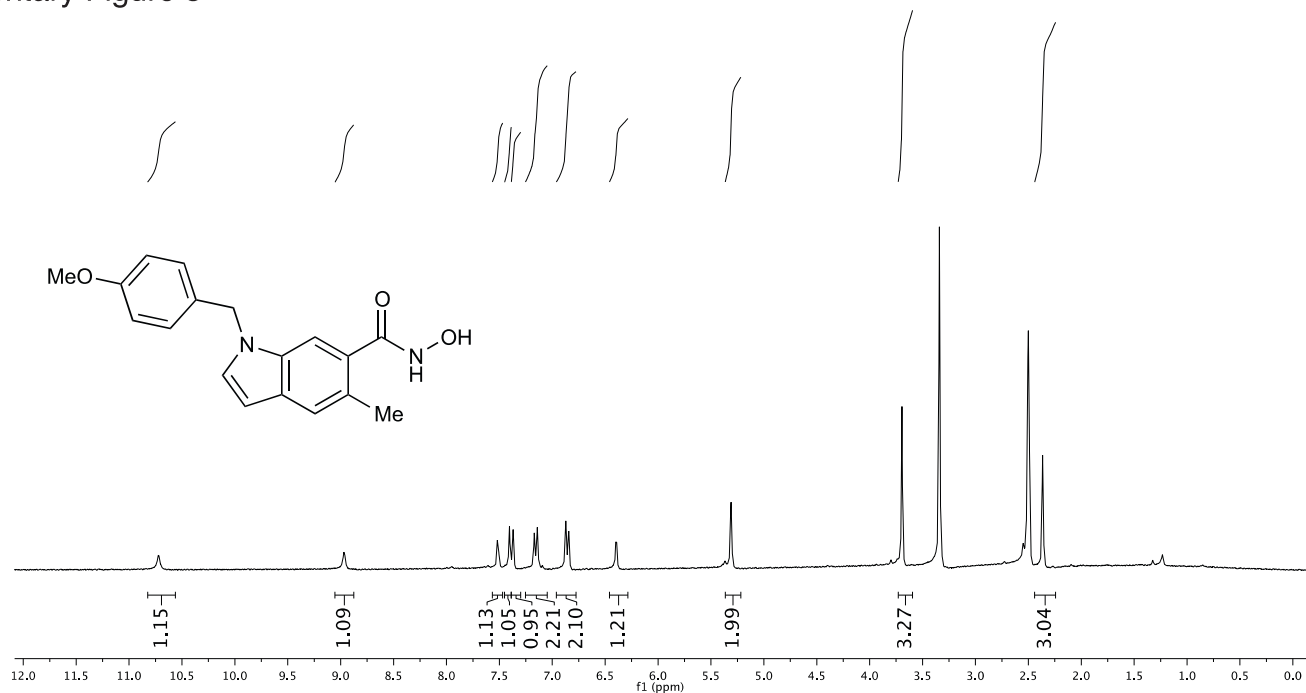

**b**

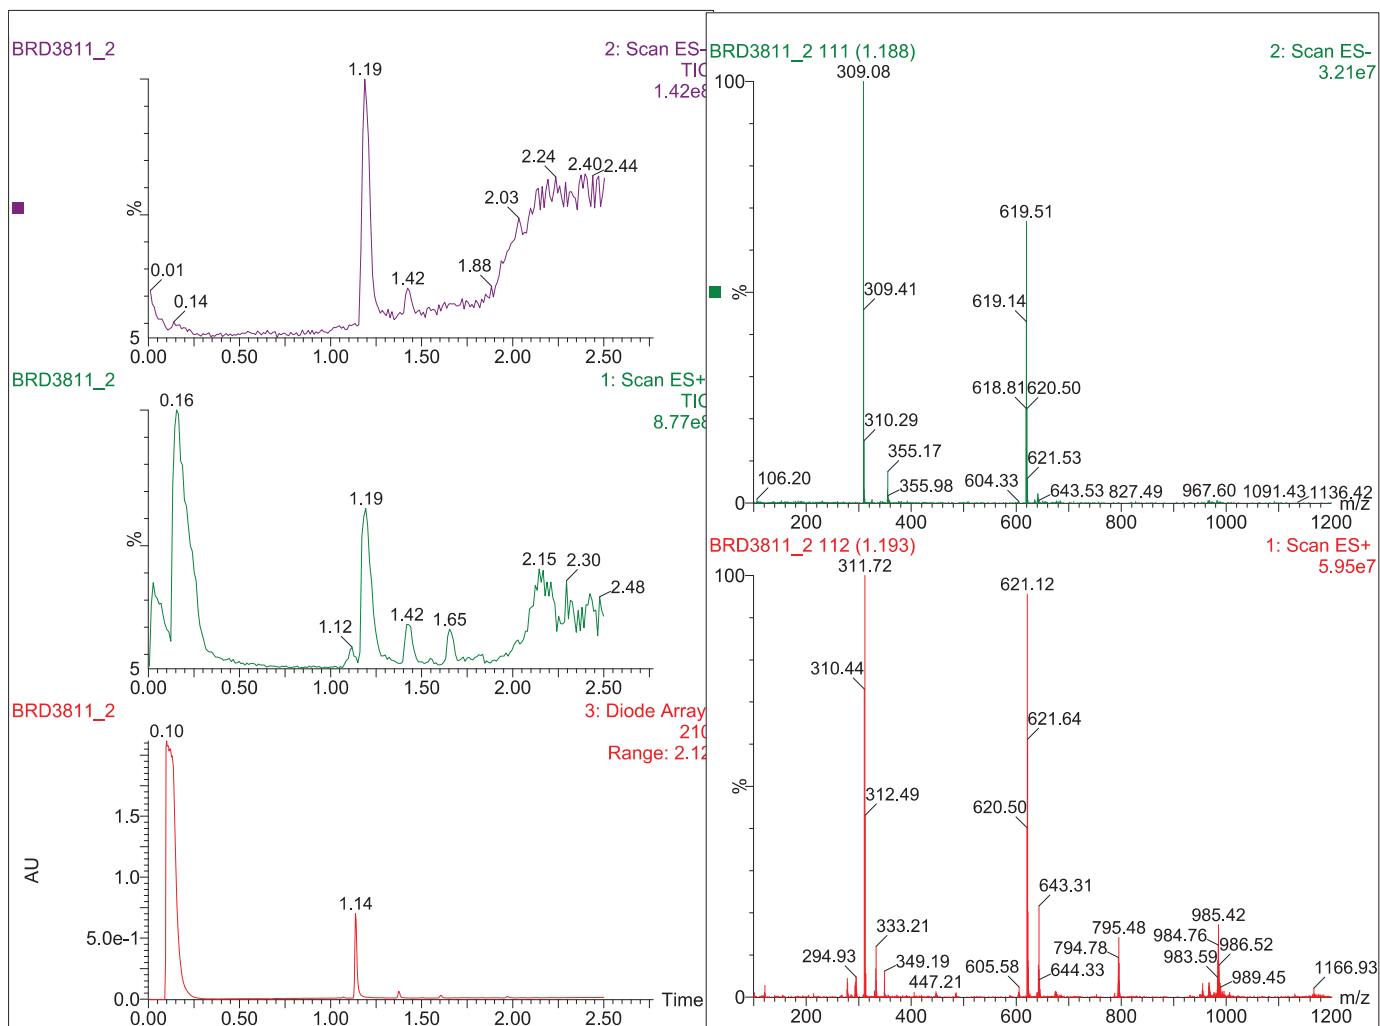

**Supplementary Figure 5. Characterization data confirming the identity and purity of BRD3811.** (a)  $^1\text{H}$  NMR of BRD3811 in DMSO- $d_6$ . (b) LCMS trace depicting the elution of BRD3811 at  $R_t = 1.14$  min. DMSO elutes at  $R_t = 0.10$ .
